# Supplementary material
Source: publisher site journal article supplement (https://www.dovepress.com/article/509476)
Supplement: Supplementary file 1 [file Supplementary+Materials+%25281%2529.docx]

**Supplementary Materials**

**List of CredibleMeds® Medications That Were Screened For** :

Albuterol

Alfuzosin

Amantadine

Amisulpride

Amitriptyline

Amphetamine

Amphotericin B

Apomorphine

Aripiprazole

Atomoxetine

Azithromycin

Buprenorphine

Capecitabine

Ceritinib

Chloral hydrate

Chloroquine

Cilostazol

Cimetidine

Ciprofloxacin

Cisapride

Citalopram

Clarithromycin

Clozapine

Dasatinib

Desipramine

Dexmedetomidine

Dexmethylphenidate

Dextroamphetamine

Diphenhydramine

Disopyramide

Dobutamine

Domperidone

Donepezil

Doxepin

Droperidol

Ephedrine

Epinephrine

Erythromycin

Escitalopram

Esomeprazole

Famotidine

Fluconazole

Fluorouracil

Fluoxetine

Flupentixol

Fluticasone

Salmeterol

Fluvoxamine

Formoterol

Furosemide

Galantamine

Granisetron

Haloperidol

Hydrochlorothiazide

Hydroxychloroquine

Hydroxyzine

Imatinib

Imipramine

Indapamide

Isoproterenol

Itraconazole

Ketoconazole

Lapatinib

Leuprolide

Levetiracetam

Levofloxacin

Loperamide

Lopinavir/Ritonavir

Lurasidone

Methadone

Methylphenidate

Metoclopramide

Metolazone

Metronidazole

Midodrine

Mifepristone

Mirabegron

Mirtazapine

Moxifloxacin

Nicardipine

Norepinephrine

Nortriptyline

Olanzapine

Omeprazole

Ondansetron

Oxaliplatin

Oxymetazoline

Oxytocin

Pantoprazole

Paroxetine

Pentamidine

Phenylephrine

Piperacillin/Tazobactam

Posaconazole

Promethazine

Propofol

Pseudoephedrine

Quetiapine

Ranolazine

Remdesivir

Ribociclib

Risperidone

Rivastigmine

Sertraline

Sorafenib

Sulfamethoxazole and Trimethoprim

Tacrolimus

Tamoxifen

Terbutaline

Tramadol

Trazodone

Venlafaxine

Voriconazole

Ziprasidone
